# Supplementary material
Source: publisher figshare collection journal article supplement (https://gsapubs.figshare.com/ndownloader/files/36561324)
Supplement: Supplementary file 1 [file 36561324]

## Sheet: Sheet1
Table S7 Multicollector LA-ICP-MS boron isotopes of tourmalines from the granite apophysis
Sample No.	KTH-6-01	KTH-6-02	KTH-6-03	KTH-6-04	KTH-6-05	KTH-6-06	KTH-6-07	KTH-6-08	KTH-6-09	KTH-6-10	KTH-6-11	KTH-6-12	KTH-6-13	KTH-6-14	KTH-6-15	KTH-9-01	KTH-9-02	KTH-9-03	KTH-9-04	KTH-9-05	KTH-9-06	KTH-9-07	KTH-9-08	KTH-9-09
δ11B	-13.1241	-13.4786	-13.2551	-13.3141	-13.1642	-13.4174	-13.4725	-13.3344	-13.3305	-13.3992	-13.1992	-13.0982	-13.0647	-12.9825	-12.812	-13.3469	-13.0378	-13.1014	-13.0739	-13.4527	-13.2941	-13.6483	-13.5558	-13.6378
1st	0.00247272	0.00316807	0.00383136	0.00315637	0.00384167	0.00268817	0.007	0.00489123	0.00274321	0.00341235	0.0100296	0.00471883	0.00360507	0.00310636	0.00282792	0.00348903	0.00457472	0.00492045	0.00342122	0.0104385	0.00704433	0.00979999	0.013407	0.0129003
